# Supplementary material
Source: publisher figshare collection journal article supplement (https://frontiersin.figshare.com/ndownloader/files/28395798)
Supplement: Supplementary file 1 [file 28395798]

TABLE S1. Endemic Philippine bird species associated with taxonomic updates and proposed revisions within the last decade. This includes the species recognized by BirdLife International (2021) that have recently been described as a result of species splits (Lohman et al. 2010, Collar 2011, Rasmussen et al. 2012, Hosner et al. 2013, Campbell et al. 2016, Arndt et al. 2019) and, if applicable, the endemic Philippine parent species from which these birds were split. We also note the birds which consist of one or more cryptic species that have been recommended to be split out but have yet to be split and recognized by BirdLife International (2021) as separate species (Lohman et al. 2010, Collar 2011, Campbell et al. 2016). Species information is included for each of the three traits we identified in our analyses as correlates of extinction risk with strong support across all competing models (endemism, geographic range size, and body mass). Predicted threats that are numerically higher than their current IUCN-designated ones are in bold. LC = Least Concern, NT = Near Threatened, VU = Vulnerable, EN = Endangered, Split = a newly described species in the last decade whose population was split out of an existing species, Parent = a species from which a recently described bird was split, and Cryptic = a species consisting of one or more populations or subspecies representing cryptic species that have yet to be split and recognized by BirdLife International (2021) as full species.

| ***Scientific Name*** | **English Name** | **IUCN Red List Threat** | **Family** | **Endemic** | **Elev. Range (m)** | **Body Mass (g)** | **Taxon.**  **Status** | **Forest Depend.** | **Fitted Threat** | **Predicted Threat** |
| --- | --- | --- | --- | --- | --- | --- | --- | --- | --- | --- |
| *Streptopelia dusumieri* | Philippine Collared-dove | VU | Columbidae | Yes | 600 | 159.5 | Split | Medium | 1.31 | NT |
| *Phapitreron leucotis* | White-eared Brown-dove | LC | Columbidae | Yes | 1500 | 111 | Parent | Medium | **0.70** | **NT** |
| *Phapitreron nigrorum* | Buff-eared Brown-dove | LC | Columbidae | Yes | 1600 | 112.5 | Split | Medium | **0.61** | **NT** |
| *Phapitreron brevirostris* | Short-billed Brown-dove | LC | Columbidae | Yes | 1600 | 104 | Split | Medium | **0.59** | **NT** |
| *Phapitreron amethystinus* | Amethyst Brown-dove | LC | Columbidae | Yes | 1500 | 132.33 | Parent | High | **1.10** | **NT** |
| *Phapitreron maculipectus* | Grey-breasted Brown-dove | NT | Columbidae | Yes | 1500 | 145 | Split | High | 1.13 | NT |
| *Treron axillaris* | Philippine Green-pigeon | LC | Columbidae | Yes | 1000 | 198 | Split | High | **1.84** | **VU** |
| *Dasylophus superciliosus* | Red-crested Malkoha | LC | Cuculidae | Yes | 700 | 117.5 | Cryptic | Medium | **1.07** | **NT** |
| *Ninox philippensis* | Luzon Boobook | LC | Strigidae | Yes | 1000 | 125 | Parent | Medium | **1.29** | **NT** |
| *Ninox leventisi* | Camiguin Boobook | EN | Strigidae | Yes | 1000 | 124 | Split | Medium | 1.28 | NT |
| *Ninox rumseyi* | Cebu Boobook | EN | Strigidae | Yes | 700 | 125 | Split | Medium | 1.40 | NT |
| *Otus megalotis* | Luzon Lowland Scops-owl | LC | Strigidae | Yes | 900 | 248.33 | Parent | High | **1.88** | **VU** |
| *Otus nigrorum* | Visayan Scops-owl | VU | Strigidae | Yes | 2900 | 200 | Split | High | 0.49 | LC |
| *Otus everetti* | Mindanao Lowland Scops-owl | LC | Strigidae | Yes | 1550 | 150 | Split | High | **1.17** | **NT** |
| *Accipiter trivirgatus* | Crested Goshawk | LC | Accipitridae | No | 1800 | 450 | Cryptic | High | 0.25 | LC |
| *Accipiter virgatus* | Besra | LC | Accipitridae | No | 2100 | 113.25 | Cryptic | High | 0.11 | LC |
| *Rhabdotorrhinus leucocephalus* | Writhed Hornbill | NT | Bucerotidae | Yes | 200 | 1153.5 | Parent | High | **4.61** | **CR** |
| *Rhabdotorrhinus waldeni* | Rufous-headed Hornbill | CR | Bucerotidae | Yes | 900 | 1153.5 | Split | High | 3.21 | EN |
| *Merops americanus* | Rufous-crowned Bee-eater | LC | Meropidae | Yes | 670 | 36 | Split | Low | 0.34 | LC |
| *Ceyx melanurus* | North Philippine Dwarf-kingfisher | VU | Alcedinidae | Yes | 750 | 16.4 | Parent | High | 0.87 | NT |
| *Ceyx mindanensis* | South Philippine Dwarf-Kingfisher | VU | Alcedinidae | Yes | 750 | 23 | Split | High | 0.97 | NT |
| *Ceyx argentatus* | Southern Silvery Kingfisher | NT | Alcedinidae | Yes | 1000 | 21.3 | Parent | High | 0.90 | NT |
| *Ceyx flumenicola* | Northern Silvery Kingfisher | NT | Alcedinidae | Yes | 750 | 17.6 | Split | High | 0.83 | NT |
| *Halcyon coromanda* | Ruddy Kingfisher | LC | Alcedinidae | No | 1800 | 76.25 | Cryptic | Medium | 0.08 | LC |
| *Halcyon gularis* | White-throated Kingfisher | LC | Alcedinidae | Yes | 1000 | 90.75 | Split | Low | 0.29 | LC |
| *Chrysocolaptes erythrocephalus* | Red-headed Flameback | EN | Picidae | Yes | 2100 | 142 | Split | Medium | 0.47 | LC |
| *Chrysocolaptes haematribon* | Luzon Flameback | LC | Picidae | Yes | 1000 | 127.5 | Split | Medium | **1.06** | **NT** |
| *Chrysocolaptes lucidus* | Buff-spotted Flameback | LC | Picidae | Yes | 1500 | 127 | Parent, Cryptic | Medium | **0.62** | **NT** |
| *Chrysocolaptes xanthocephalus* | Yellow-faced Flameback | EN | Picidae | Yes | 900 | 142 | Split | Medium | 1.17 | NT |
| *Dinopium everetti* | Spot-throated Flameback | NT | Picidae | Yes | 1700 | 91.5 | Split | Medium | 0.58 | NT |
| *Mulleripicus funebris* | Northern Sooty Woodpecker | NT | Picidae | Yes | 1600 | 161 | Parent | High | 1.21 | NT |
| *Mulleripicus fuliginosus* | Southern Sooty Woodpecker | VU | Picidae | Yes | 500 | 164 | Split | High | 2.32 | VU |
| *Loriculus philippensis* | Philippine Hanging-parrot | LC | Psittacidae | Yes | 1250 | 35.5 | Cryptic | Low | 0.16 | LC |
| *Prioniturus waterstradti* | Mindanao Racquet-tail | NT | Psittacidae | Yes | 1880 | 122 | Split | High | 0.89 | NT |
| *Prioniturus montanus* | Montane Racquet-tail | NT | Psittacidae | Yes | 2200 | 122 | Split | High | 0.71 | NT |
| *Tanygnathus everetti* | Blue-backed Parrot | EN | Psittacidae | Yes | 500 | 253.5 | Split, Cryptic | Medium | 1.56 | VU |
| *Sarcophanops samarensis* | Visayan Wattled Broadbill | VU | Eurylaimidae | Yes | 500 | 37.5 | Split | High | 1.72 | VU |
| *Sarcophanops steerii* | Mindanao Wattled Broadbill | VU | Eurylaimidae | Yes | 800 | 39.87 | Parent | Medium | 0.83 | NT |
| *Oriolus steerii* | Philippine Oriole | LC | Oriolidae | Yes | 1200 | 70.91 | Parent | Medium | **0.74** | **NT** |
| *Oriolus albiloris* | White-lored Oriole | LC | Oriolidae | Yes | 1200 | 70.91 | Split | Medium | **0.84** | **NT** |
| *Coracina striata* | Bar-bellied Cuckooshrike | LC | Campephagidae | No | 2000 | 112.33 | Cryptic | Medium | 0.08 | LC |
| *Rhipidura cyaniceps* | Blue-headed Fantail | LC | Rhipiduridae | Yes | 1000 | 13.8 | Parent | Medium | **0.61** | **NT** |
| *Rhipidura albiventris* | Visayan Fantail | LC | Rhipiduridae | Yes | 500 | 14 | Split | Medium | **0.87** | **NT** |
| *Rhipidura samarensis* | Visayan Blue Fantail | LC | Rhipiduridae | Yes | 1200 | 12.6 | Split | High | **0.67** | **NT** |
| *Rhipidura superciliaris* | Mindanao Blue Fantail | LC | Rhipiduridae | Yes | 1200 | 12.66 | Parent | High | **0.67** | **NT** |
| *Rhipidura nigritorquis* | Philippine Pied Fantail | LC | Rhipiduridae | Yes | 800 | 16.4 | Split | Medium | **0.53** | **NT** |
| *Dicrurus hottentottus* | Hair-crested Drongo | LC | Dicruridae | No | 2440 | 79.19 | Parent, Cryptic | Medium | 0.06 | LC |
| *Dicrurus menagei* | Tablas Drongo | EN | Dicruridae | Yes | 585 | 51.7 | Split | High | 1.48 | NT |
| *Corvus enca* | Slender-billed Crow | LC | Corvidae | No | 1000 | 238 | Cryptic | Medium | 0.18 | LC |
| *Orthotomus castaneiceps* | Chestnut-crowned Tailorbird | LC | Cisticolidae | Yes | 2900 | 7 | Parent | Medium | 0.12 | LC |
| *Orthotomus chloronotus* | Green-backed Tailorbird | LC | Cisticolidae | Yes | 1060 | 10.6 | Split | Medium | 0.46 | LC |
| *Orthotomus frontalis* | Rufous-fronted Tailorbird | LC | Cisticolidae | Yes | 2900 | 7 | Split | Medium | 0.12 | LC |
| *Robsonius rabori* | Cordillera Ground-warbler | VU | Locustellidae | Yes | 800 | 61 | Parent | High | 1.33 | NT |
| *Robsonius thompsoni* | Sierra Madre Ground-warbler | LC | Locustellidae | Yes | 1300 | 58.75 | Split | High | **1.06** | **NT** |
| *Hypsipetes philippinus* | Philippine Bulbul | LC | Pycnonotidae | Yes | 2000 | 33.5 | Cryptic | Medium | 0.36 | LC |
| *Pycnonotus goiavier* | Yellow-vented Bulbul | LC | Pycnonotidae | No | 1830 | 29.6 | Cryptic | Low | 0.02 | LC |
| *Phylloscopus trivirgatus* | Mountain Warbler | LC | Phylloscopidae | No | 2540 | 9 | Cryptic | High | 0.04 | LC |
| *Sitta oenochlamys* | Sulphur-billed Nuthatch | LC | Sittidae | Yes | 2600 | 16.35 | Cryptic | High | 0.29 | LC |
| *Rhabdornis inornatus* | Stripe-breasted Rhabdornis | LC | Sturnidae | Yes | 200 | 39.1 | Parent | High | **1.71** | **VU** |
| *Rhabdornis grandis* | Grand Rhabdornis | LC | Sturnidae | Yes | 1250 | 45.5 | Split | High | **0.79** | **NT** |
| *Rhabdornis rabori* | Visayan Rhabdornis | VU | Sturnidae | Yes | 950 | 39.1 | Split | High | 1.01 | NT |
| *Copsychus mindanensis* | Philippine Magpie-robin | LC | Muscicapidae | Yes | 1900 | 32.85 | Split | Medium | 0.28 | LC |
| *Kittacincla luzoniensis* | White-browed Shama | LC | Muscicapidae | Yes | 1000 | 24 | Parent | High | **0.88** | **NT** |
| *Kittacincla superciliaris* | Visayan Shama | LC | Muscicapidae | Yes | 1000 | 24.05 | Split | High | **0.88** | **NT** |
| *Eumyias panayensis* | Turquoise Flycatcher | LC | Muscicapidae | No | 1600 | 19.8 | Cryptic | Medium | 0.10 | LC |
| *Irena cyanogastra* | Philippine Fairy-bluebird | NT | Irenidae | Yes | 1500 | 83.18 | Cryptic | High | 1.02 | NT |
| *Prionochilus olivaceus* | Olive-backed Flowerpecker | LC | Dicaeidae | Yes | 1000 | 9 | Cryptic | Medium | 0.43 | LC |
| *Dicaeum trigonostigma* | Orange-bellied Flowerpecker | LC | Dicaeidae | No | 1800 | 6.63 | Cryptic | Medium | 0.04 | LC |
| *Anthreptes malacensis* | Brown-throated Sunbird | LC | Nectariniidae | No | 1200 | 11.83 | Cryptic | Medium | 0.06 | LC |
| *Cinnyris jugularis* | Olive-backed Sunbird | LC | Nectariniidae | No | 1700 | 8.45 | Cryptic | Low | 0.01 | LC |
